# Supplementary material for: Genome-Wide Association Mapping in a Rice MAGIC Plus Population Detects QTLs and Genes Useful for Biofortification
Source: Front Plant Sci. 2018 Sep 20;9:1347. doi: 10.3389/fpls.2018.01347 (PMC6158342; doi:10.3389/fpls.2018.01347)
Supplement: TABLE S2 — QTL lift-over results (CSV). [file Table_2.XLSX]

## Sheet: Sheet1
S2 Table QTL lift-over results
Trait	QTLname	SNP	ChrNum	adjusted start	adjusted end	adjusted size	IR8-ChrName	IR8-start	IR8-end	IR8-size	MH63-Chr-name	MH63-Start	MH63-end	MH63-size
Fe	qFE3.1	S3_13026098	3	12930000	13030000	100000	Chr03	13267807	13367502	99695	Chr03	12464560	12565842	101282
Fe	qFE3.2	S3_29613916	3	28530000	29660000	1130000
Fe	qFE7.1	S7_29288449	7	29230000	29330000	100000	Chr07	29878134	29977644	99510	Chr07	28069949	28169540	99591
Fe	qFE9.1	S9_11707990	9	11710000	11930000	220000	Chr09	12434642	12678828	244186
Fe	qFE9.2	S9_22203582	9	22190000	22420000	230000	Chr09	23371436	23702423	330987	Chr09	21808006	22096285	288279
Fe	qFE10.1	S10_14678241	10	13880000	14680000	800000	Chr10	15659457	16436669	777212	Chr10	14634308	15344287	709979
Fe	qFE11.1	S11_7122972	11	7070000	7170000	100000	Chr11	7342231	8874336	1532105
Zn	qZN1.1	S1_2636746	1	2590000	2690000	100000	Chr01	2638141	2893335	255194	Chr01	2435065	2690342	255277
Zn	qZN2.1	S2_29206428	2	28730000	29210000	480000
Zn	qZN4.1	S4_23199945	4	22030000	23200000	1170000	Chr04	21833401	23066989	1233588
Zn	qZN6.1	S6_217858	6	170000	270000	100000	Chr06	69333	160342	91009	Chr06	59541	150585	91044
Zn	qZN6.2	S6_2939487	6	2780000	2960000	180000	Chr06	2642258	2818097	175839	Chr06	2479035	2659318	180283
Zn	qZN7.1	S7_29350591	7	29290000	29620000	330000	Chr07	29923414	30314978	391564	Chr07	28115237	28506827	391590
Zn	qZN12.1	S12_22528624	12	22530000	24060000	1530000	Chr12	20638552	22320463	1681911	Chr12	20290153	21794057	1503904
BlastR	qBlast1.1	S1_12361598	1	12300385	12400385	100000	Chr01	12508772	12617349	108577	Chr01	11369567	11478111	108544
BlastR	qBlast1.2	S1_13333611	1	13333611	13798425	464814	Chr01	13339241	14110311	771070	Chr01	12211483	13018509	807026
BlastR	qBlast8.1	S8_233996	8	133996	333996	200000	Chr08	167412	362902	195490
